# Supplementary material for: Mono-substituted silicotungstates as active catalysts for sustainable oxidations: homo- and heterogeneous performance
Source: Royal Society of Chemistry journal article supplement (doi:10.1039/c3nj00243h), 2013-01-01
Supplement: c3nj00243h.pdf [file c3nj00243h.pdf]

# ELECTRONIC SUPPORTING INFORMATION

## **Keggin-type Silicotungstates as efficient catalysts for sustainable oxidations with H<sub>2</sub>O<sub>2</sub>**

Saete S. Balula<sup>a</sup> \*, Luís Cunha-Silva<sup>a</sup>, Isabel C. M. S. Santos<sup>b</sup>, Ana C. Estrada<sup>c</sup>,  
A.C. Fernandes<sup>d</sup>, José A. S. Cavaleiro<sup>b</sup>, João Pires<sup>d</sup>, Cristina Freire<sup>a</sup>, Ana M. V. Cavaleiro<sup>b</sup>

<sup>a</sup> *REQUIMTE & Departamento de Química e Bioquímica, Faculdade de Ciências,*

*Universidade do Porto, 4169-007 Porto, Portugal;*

<sup>b</sup> *Departamento de Química, QOPNA, Universidade de Aveiro, 3810-193 Aveiro, Portugal;*

<sup>c</sup> *Departamento de Química, CICECO, Universidade de Aveiro, 3810-193 Aveiro, Portugal;*

<sup>d</sup> *Departamento de Química e Bioquímica, CQB, Faculdade de Ciências, Universidade de Lisboa,*

*Campo Grande C8, 1749-016 Lisboa, Portugal*

\*Corresponding author: Dr. Saete S. Balula; e-mail: [sbalula@fc.up.pt](mailto:sbalula@fc.up.pt); Tel.: +351 220402576; Fax: +351  
220402659

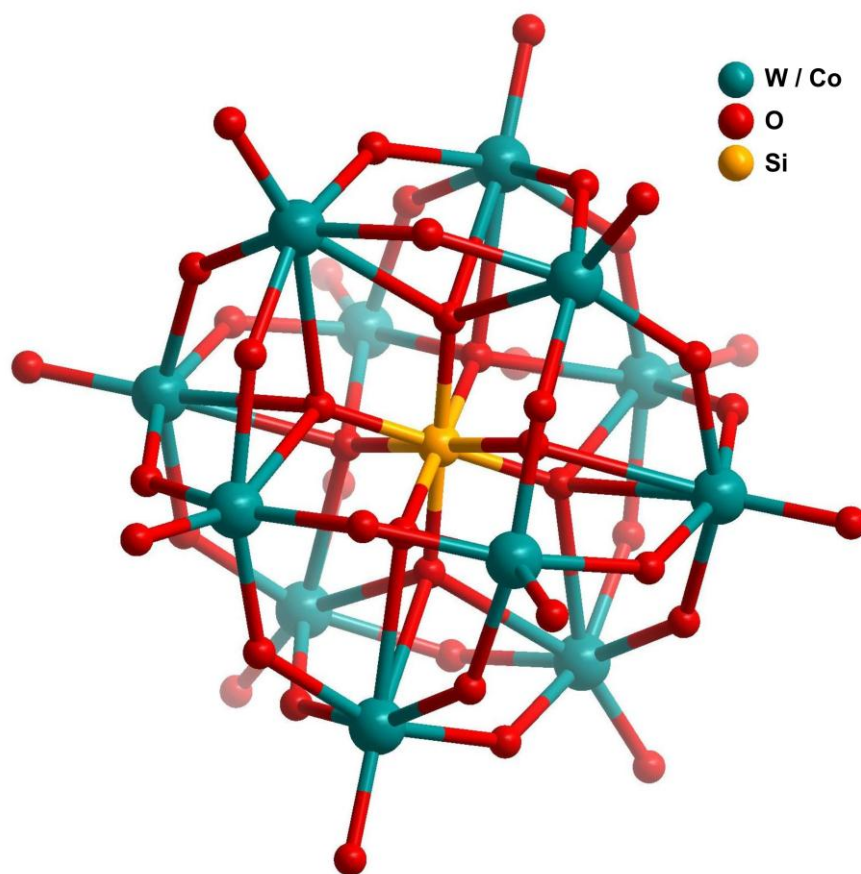

**Figure S1.** Ball-and-Stick representation of the polyoxoanion  $[\text{SiW}_{11}\text{Co}(\text{H}_2\text{O})\text{O}_{39}]^{6-}$  present in the compound  $\text{K}_4\text{H}_2[\text{SiW}_{11}\text{CoH}_2\text{O}_{40}] \cdot 22\text{H}_2\text{O}$ ,  $\text{KSiW}_{11}\text{Co}$ .

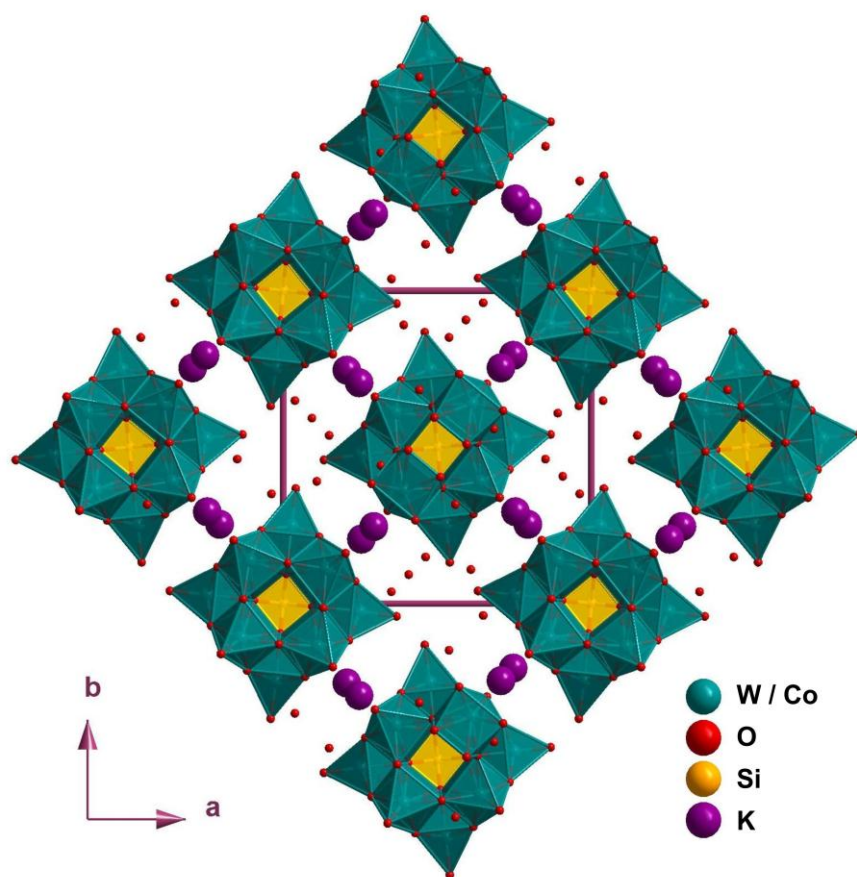

**Figure S2.** Crystalline packing of compound  $\text{K}_4\text{H}_2[\text{SiW}_{11}\text{CoH}_2\text{O}_{40}] \cdot 22\text{H}_2\text{O}$ , ( $\text{KSiW}_{11}\text{Co}$ ) viewed along the  $[001]$  direction of the unit cell.

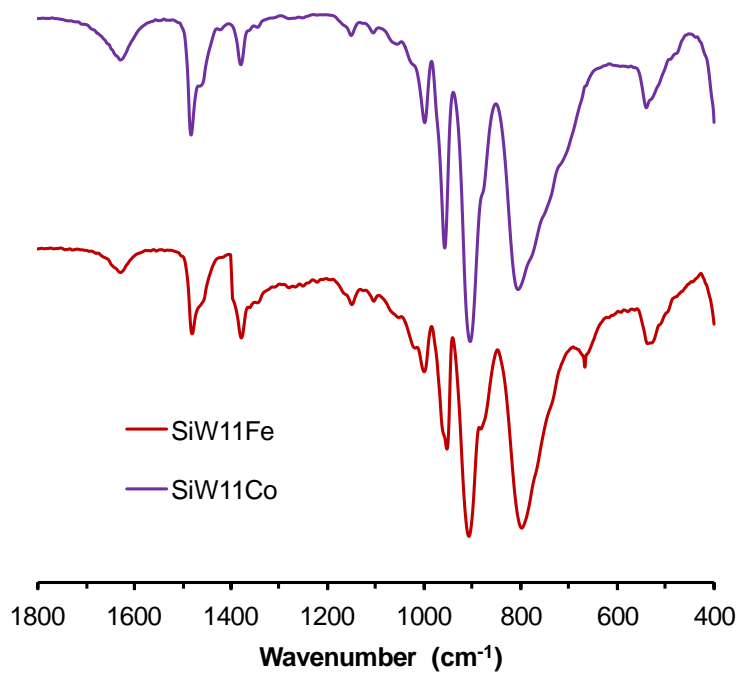

**Figure S3.** FT-IR spectra of the TBA salts of mono-substituted silicotungstates.

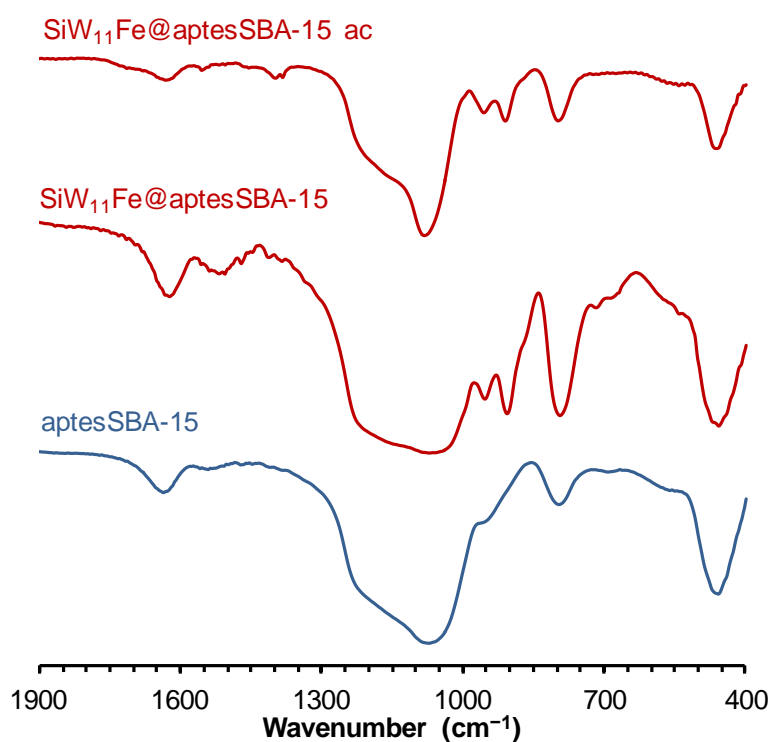

**Figure S4.** FT-IR spectra of support aptesSBA-15 and SiW<sub>11</sub>Fe@aptSBA-15 composites before and after catalytic use in the wavenumber region between 400 and 1900 cm<sup>-1</sup>. Name of sample with ac corresponds to recovered sample after catalyze the styrene oxidation reaction.

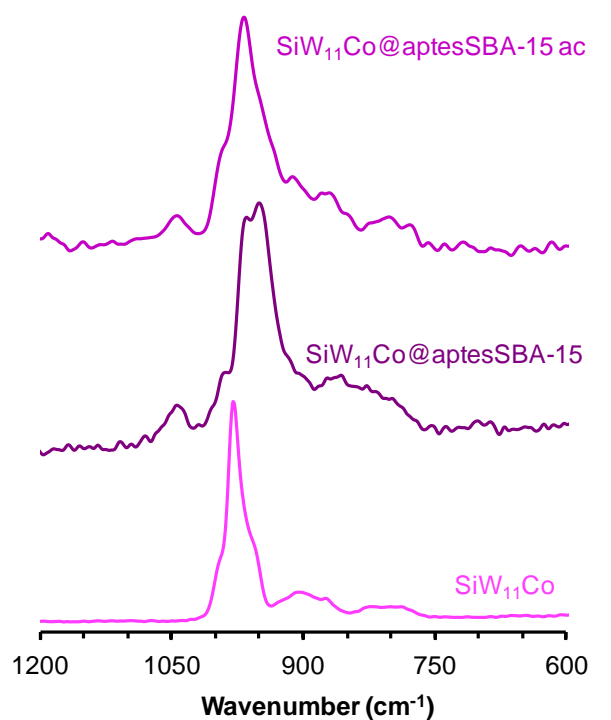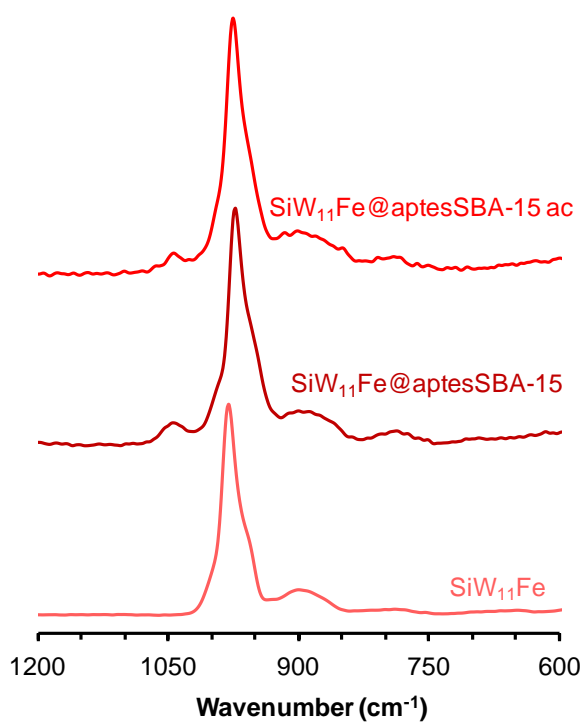

**Figure S5.** FT-Raman spectra of the TBA salt of silicotungstates and their composites before and after catalytic use in the wavenumber region between 600 and 1200  $\text{cm}^{-1}$ . Name of samples with ac corresponds to recovered samples after catalyze the styrene oxidation reaction.

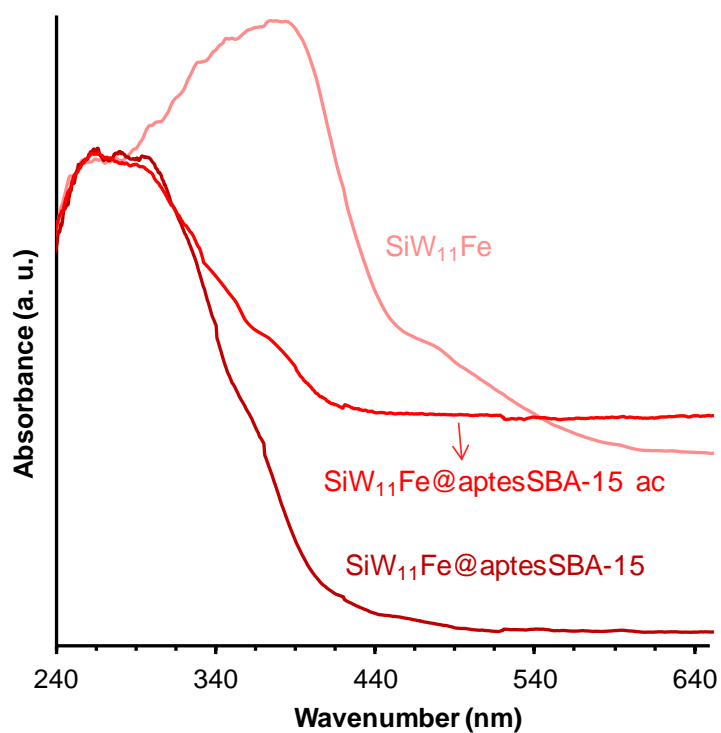

**Figure S6.** Diffuse reflectance spectra of mono-substituted SiW<sub>11</sub>Fe and its composite before and after catalytic use (ac) in the wavenumber region between 640 and 240 nm<sup>-1</sup>. Name of sample with ac corresponds to recovered sample after catalyze the styrene oxidation reaction.

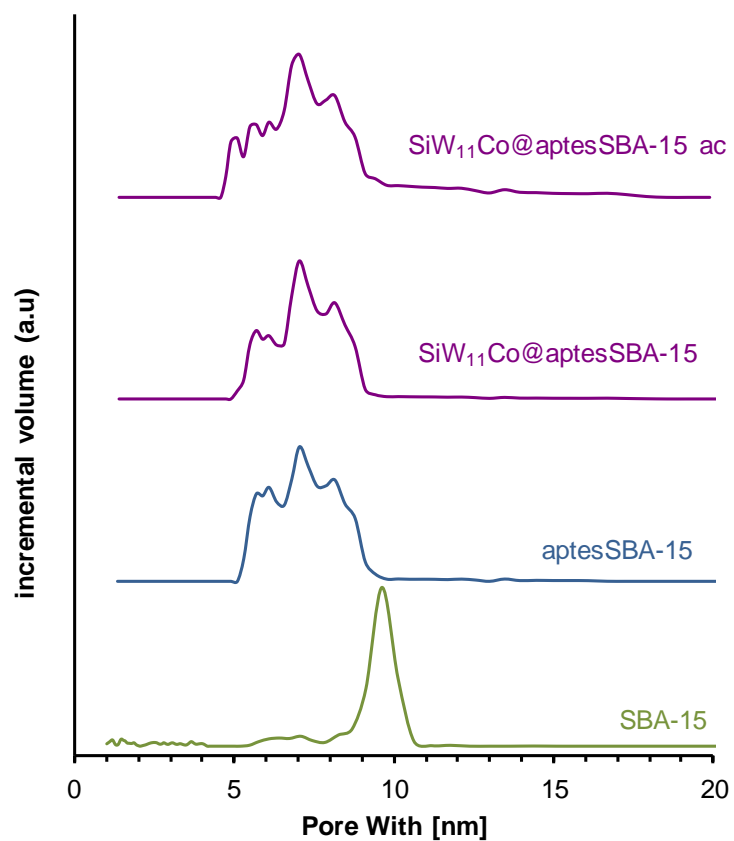

**Figure S7.** Nitrogen adsorption-desorption isotherms at -196 °C for the initial and modified SBA-15 samples. Name of sample with ac corresponds to recovered sample after catalyze the styrene oxidation reaction.



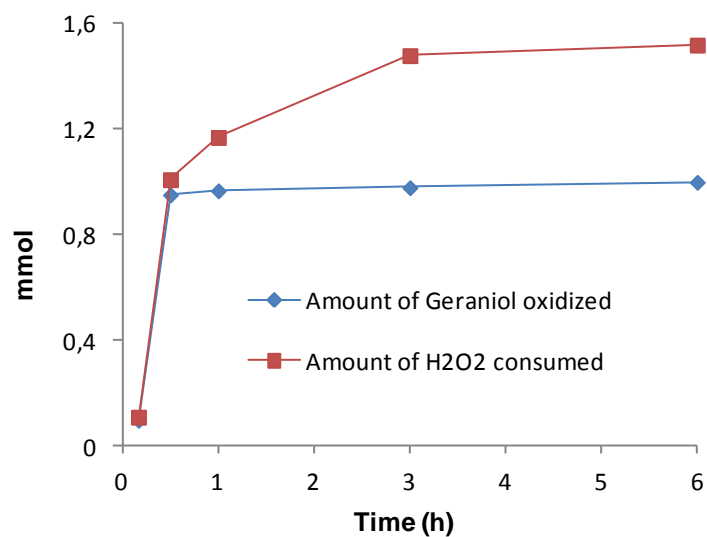

**Figure S8.** Comparison between the amount of geraniol oxidized and the amount of oxidant H<sub>2</sub>O<sub>2</sub> consumed in the reaction catalyzed by the homogeneous SiW<sub>11</sub>Co and using acetonitrile as solvent.

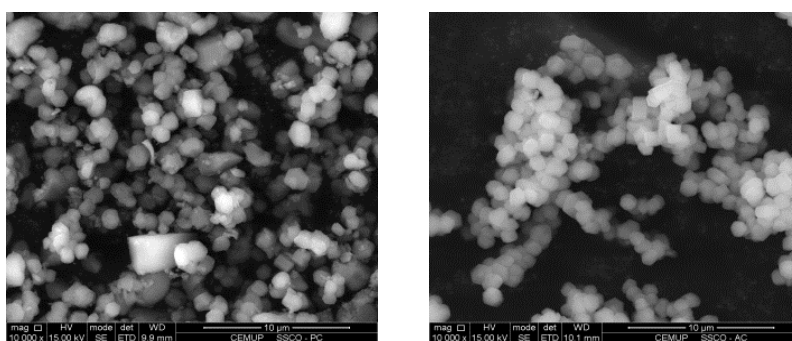

**Figure S9.** Scanning Electronic Microscopy images of SiW<sub>11</sub>Co@aptesSBA-15 before (left) and after (right) to be used as catalyst in the oxidation of styrene with H<sub>2</sub>O<sub>2</sub>.
